# Supplementary material
Source: PubMed Central journal article supplement (PMC5167500)
Supplement: NIHMS823242-supplement.pdf [file NIHMS823242-supplement.pdf]

**Appendix**  
**Life Course Social Mobility and Reduced Risk of Adverse Birth Outcomes**  
**Osypuk et al.**

**Appendix Table 1.** Characteristics of the Black/African American female population, ages 18 to 45, who have just birthed a singleton baby in the U.S., Michigan, Wayne County, and the LIFE Sample (N=1,408)

| Characteristic                  | U.S.       | Michigan   | Wayne<br>County, MI | LIFE sample |
|---------------------------------|------------|------------|---------------------|-------------|
| Age                             | 26.4 ± 5.9 | 25.6 ± 5.9 | 25.5 ± 5.9          | 27.3 ± 6.2  |
| Married                         | 28%        | 21%        | 17%                 | 28%         |
| Education                       |            |            |                     |             |
| <High school diploma/GED        | 19%        | 21%        | 24%                 | 13%         |
| High school diploma/GED or more | 81%        | 79%        | 76%                 | 87%         |
| Mean number of live births      | 2.2 ± 1.4  | 2.6 ± 1.5  | 2.3 ± 1.5           | 2.0 ± 1.2   |
| Low birth weight                | 11%        | 12%        | 12%                 | 13%         |
| Preterm birth                   | 15%        | 16%        | 17%                 | 16%         |

*Note:* Data from Centers for Disease Control and Prevention, National Center for Health Statistics, 2010 Natality data. LIFE, Life-course Influences of Fetal Environments Study; GED, General Educational Development

**Appendix**  
**Life Course Social Mobility and Reduced Risk of Adverse Birth Outcomes**  
**Osypuk et al.**

**Appendix Table 2.** Associations of Improved Social Mobility Trajectories and SGA and PTB, Excluding Extreme/Very Preterm Births (GA<32 Weeks) N=1,362

| Social mobility measure                | SGA    |       |                 |       |                | PTB    |       |                 |       |                |
|----------------------------------------|--------|-------|-----------------|-------|----------------|--------|-------|-----------------|-------|----------------|
|                                        | B      | SE    | <i>p</i> -value | RR    | 95% CI         | B      | SE    | <i>p</i> -value | RR    | 95% CI         |
| <b>Educational mobility trajectory</b> |        |       |                 |       |                |        |       |                 |       |                |
| Mother to daughter                     |        |       |                 |       |                |        |       |                 |       |                |
| Model 2                                | -0.274 | 0.090 | 0.002           | 0.760 | (0.640, 0.908) | -0.101 | 0.096 | 0.291           | 0.904 | (0.750, 1.090) |
| <b>Financial mobility trajectory</b>   |        |       |                 |       |                |        |       |                 |       |                |
| Early childhood to current             |        |       |                 |       |                |        |       |                 |       |                |
| Model 2                                | -0.150 | 0.090 | 0.095           | 0.861 | (0.722, 1.026) | -0.107 | 0.100 | 0.283           | 0.899 | (0.739, 1.092) |
| Middle childhood to current            |        |       |                 |       |                |        |       |                 |       |                |
| Model 2                                | -0.132 | 0.082 | 0.108           | 0.877 | (0.746, 1.030) | -0.118 | 0.090 | 0.188           | 0.888 | (0.745, 1.060) |

*Notes:* Model 2: adjusted for age, childhood SEP, and parity. Relative risks calculated from Poisson regression models. All social mobility measures are scaled so that a one-unit change corresponds with a one-SD change. Missing data were imputed using multiple imputation by chained equations.

SGA, small for gestational age; PTB, preterm birth; GA, gestational age; B, Beta; RR, risk ratio; SEP, socioeconomic position

**Appendix**  
**Life Course Social Mobility and Reduced Risk of Adverse Birth Outcomes**  
**Osypuk et al.**

**Appendix Table 3.** LIFE Sample Characteristics: Perceived Financial Situation Across the Life course

| Time period                      | Perceived financial situation N (%) |                         |                                    |                                |            |          |
|----------------------------------|-------------------------------------|-------------------------|------------------------------------|--------------------------------|------------|----------|
|                                  | Very poor, not enough to get by     | Barely enough to get by | Had enough to get by but no extras | Had more than enough to get by | Well to do | Missing  |
| Current                          | 20 (1%)                             | 91 (6%)                 | 710 (50%)                          | 445 (32%)                      | 139 (10%)  | 3 (0.2%) |
| Early childhood: Birth to age 10 | 31 (2%)                             | 129 (9%)                | 394 (28%)                          | 583 (41%)                      | 252 (18%)  | 19 (1%)  |
| Middle childhood: Age 10 to 18   | 18 (1%)                             | 112 (8%)                | 471 (33%)                          | 568 (40%)                      | 232 (16%)  | 7 (1%)   |

*Notes:* N=1,408

LIFE, Life-course Influences of Fetal Environments Study

**Appendix**  
**Life Course Social Mobility and Reduced Risk of Adverse Birth Outcomes**  
**Osypuk et al.**

**Appendix Table 4.** LIFE Sample Characteristics: Educational Attainment of Participating Woman and Her Mother

| Subject        | Level of educational attainment N (%) |                           |                                          |                     |          |
|----------------|---------------------------------------|---------------------------|------------------------------------------|---------------------|----------|
|                | <12 years of school, no GED           | 12 years of school or GED | Some college or 13 to 15 years of school | 16+ years of school | Missing  |
| Woman's own    | 115 (8%)                              | 332 (24%)                 | 619 (44%)                                | 336 (24%)           | 6 (0.4%) |
| Woman's mother | 146 (10%)                             | 460 (33%)                 | 410 (29%)                                | 317 (23%)           | 75 (5%)  |

*Notes:* N=1,408

LIFE, LIFE-course Influences of Fetal Environments Study; GED, General Educational Development

**Appendix**  
**Life Course Social Mobility and Reduced Risk of Adverse Birth Outcomes**  
**Osypuk et al.**

**Appendix Table 5.** Model Fit Diagnostics for LIFE Social Mobility Unimputed Poisson Regression Models

| Social mobility measure                |         | SGA                                 |       | PTB                                 |       | LBW                                 |       |
|----------------------------------------|---------|-------------------------------------|-------|-------------------------------------|-------|-------------------------------------|-------|
|                                        |         | McFadden's<br>Pseudo R <sup>2</sup> | AIC   | McFadden's<br>Pseudo R <sup>2</sup> | AIC   | McFadden's<br>Pseudo R <sup>2</sup> | AIC   |
| <b>Educational mobility trajectory</b> |         |                                     |       |                                     |       |                                     |       |
| Mother to daughter                     |         |                                     |       |                                     |       |                                     |       |
|                                        | Model 1 | 0.0041                              | 0.853 | 0.0011                              | 0.922 | 0.0043                              | 0.780 |
|                                        | Model 2 | 0.0159                              | 0.847 | 0.0032                              | 0.924 | 0.0083                              | 0.781 |
|                                        | Model 3 | 0.0171                              | 0.849 | 0.0043                              | 0.926 | 0.0099                              | 0.782 |
| <b>Financial mobility trajectory</b>   |         |                                     |       |                                     |       |                                     |       |
| Early childhood to current             |         |                                     |       |                                     |       |                                     |       |
|                                        | Model 1 | 0.0007                              | 0.855 | 0.0000                              | 0.921 | 0.0009                              | 0.781 |
|                                        | Model 2 | 0.0106                              | 0.850 | 0.0025                              | 0.923 | 0.0055                              | 0.782 |
|                                        | Model 3 | 0.0171                              | 0.849 | 0.0043                              | 0.926 | 0.0099                              | 0.782 |
| Middle childhood to current            |         |                                     |       |                                     |       |                                     |       |
|                                        | Model 1 | 0.0003                              | 0.855 | 0.0016                              | 0.920 | 0.0001                              | 0.781 |
|                                        | Model 2 | 0.0104                              | 0.851 | 0.0030                              | 0.923 | 0.0054                              | 0.782 |
|                                        | Model 3 | 0.0170                              | 0.849 | 0.0048                              | 0.926 | 0.0093                              | 0.783 |

*Notes:* Model 1: bivariate. Model 2: adjusted for age, childhood SEP, and parity. Model 3: educational mobility models adjusted for age, childhood SEP, parity, and financial mobility from early childhood to current. Financial mobility models adjusted for age, childhood SEP, parity, and educational mobility from mother to daughter.

LIFE, LIFE-course Influences of Fetal Environments Study; SGA, small for gestational age; PTB, preterm birth; LBW, low birthweight; AIC, Akaike Information Criterion; SEP, socioeconomic position

**Appendix**  
**Life Course Social Mobility and Reduced Risk of Adverse Birth Outcomes**  
**Osypuk et al.**

**Appendix Table 6.** Associations of Improved Social Mobility With Primary Birth Outcomes, Restricting Social Mobility to Either Stable/Upward Trajectories, or Stable/Downward Trajectories

| Outcome and social mobility measure     | Stable/Upward Mobility |       |                 |       |                | Stable/Downward Mobility |       |                 |       |                |
|-----------------------------------------|------------------------|-------|-----------------|-------|----------------|--------------------------|-------|-----------------|-------|----------------|
|                                         | B                      | SE    | <i>p</i> -value | RR    | 95% CI         | B                        | SE    | <i>p</i> -value | RR    | 95% CI         |
| <b>Small for gestational age</b>        |                        |       |                 |       |                |                          |       |                 |       |                |
| Educational mobility mother to daughter | -0.226                 | 0.135 | 0.093           | 0.797 | (0.612, 1.039) | -0.264                   | 0.145 | 0.068           | 0.768 | (0.578, 1.020) |
| Financial mobility early childhood      | -0.285                 | 0.161 | 0.077           | 0.752 | (0.549, 1.031) | -0.104                   | 0.122 | 0.394           | 0.901 | (0.709, 1.145) |
| Financial mobility middle childhood     | -0.421                 | 0.177 | 0.017           | 0.656 | (0.464, 0.928) | 0.020                    | 0.117 | 0.867           | 1.020 | (0.810, 1.284) |
| <b>Preterm birth</b>                    |                        |       |                 |       |                |                          |       |                 |       |                |
| Educational mobility mother to daughter | -0.206                 | 0.135 | 0.127           | 0.814 | (0.624, 1.060) | 0.009                    | 0.132 | 0.946           | 1.009 | (0.779, 1.306) |
| Financial mobility early childhood      | -0.118                 | 0.142 | 0.408           | 0.889 | (0.673, 1.174) | -0.069                   | 0.122 | 0.573           | 0.934 | (0.735, 1.186) |
| Financial mobility middle childhood     | -0.114                 | 0.141 | 0.416           | 0.892 | (0.677, 1.175) | -0.105                   | 0.102 | 0.301           | 0.900 | (0.738, 1.099) |

*Notes:* Model 2, which adjusted for age, childhood SEP, and parity. Relative risks calculated from Poisson regression models. All social mobility measures are scaled so that a one-unit change corresponds with a one-SD change. Missing data were imputed using multiple imputation by chained equations. Sample for “stable/up” includes social mobility values 0 through 4 (financial) or 3 (education); sample for “stable/down” includes social mobility values -4 (financial) or -3 (education) through 0. The risk ratio is interpreted as the risk of the outcome, comparing any point on the social mobility scale, to a point one-SD above it. Let’s use educational mobility as an example (SD=1.1). Although the downwardly mobile/stable sample models a different segment (-3 to 0) of the educational mobility score compared to the upwardly mobile/stable subsample (0 to +3), both subscales compare an approximately one point difference representing an improvement in intergenerational educational mobility (e.g., comparing -2 vs. -0.09 for the downwardly mobile; 1 vs. 2.1 for the upwardly mobile). Therefore, someone who declines in educational mobility between generations incurs a higher SGA risk compared to one who improves in educational mobility. SGA, small for gestational age; B, Beta; RR, risk ratio; SEP, socioeconomic position

**Appendix**  
**Life Course Social Mobility and Reduced Risk of Adverse Birth Outcomes**  
**Osypuk et al.**

**Appendix Table 7.** Associations of Improved Social Mobility With Secondary Birth Outcomes, Restricting Social Mobility to Either Stable/Upward Trajectories, or Stable/Downward Trajectories

| Outcome and social mobility measure     | Stable/Upward mobility |       |                 |       |                | Stable/Downward mobility |       |                 |       |                |
|-----------------------------------------|------------------------|-------|-----------------|-------|----------------|--------------------------|-------|-----------------|-------|----------------|
|                                         | B                      | SE    | <i>p</i> -value | RR    | 95% CI         | B                        | SE    | <i>p</i> -value | RR    | 95% CI         |
| <b>Spontaneous preterm birth</b>        |                        |       |                 |       |                |                          |       |                 |       |                |
| Educational mobility mother to daughter | -0.163                 | 0.174 | 0.351           | 0.850 | (0.604, 1.196) | 0.150                    | 0.172 | 0.385           | 1.162 | (0.829, 1.629) |
| Financial mobility early childhood      | -0.180                 | 0.183 | 0.325           | 0.835 | (0.583, 1.196) | -0.103                   | 0.160 | 0.520           | 0.902 | (0.659, 1.234) |
| Financial mobility middle childhood     | -0.225                 | 0.195 | 0.250           | 0.799 | (0.545, 1.171) | -0.128                   | 0.133 | 0.338           | 0.880 | (0.678, 1.143) |
| <b>Low birth weight</b>                 |                        |       |                 |       |                |                          |       |                 |       |                |
| Educational mobility mother to daughter | -0.168                 | 0.141 | 0.233           | 0.846 | (0.642, 1.114) | 0.088                    | 0.163 | 0.590           | 1.092 | (0.793, 1.503) |
| Financial mobility early childhood      | -0.327                 | 0.168 | 0.051           | 0.721 | (0.519, 1.001) | -0.011                   | 0.134 | 0.938           | 0.990 | (0.760, 1.288) |
| Financial mobility middle childhood     | -0.111                 | 0.151 | 0.459           | 0.895 | (0.666, 1.202) | -0.045                   | 0.124 | 0.718           | 0.956 | (0.750, 1.219) |

*Notes:* Model 2, which adjusted for age, childhood SEP, and parity. Relative risks calculated from Poisson regression models. All social mobility measures are scaled so that a one-unit change corresponds with a one-SD change. Missing data were imputed using multiple imputation by chained equations. Sample for “stable/up” includes social mobility values 0 through 4 (financial) or 3 (education); sample for “stable/down” includes social mobility values -4 (financial) or -3 (education) through 0. For interpretation of the coefficient, refer to the notes in Appendix Table 6.

B, Beta; RR, risk ratio; SEP, socioeconomic position

**Appendix Table 8.** Associations of Improved Social Mobility Trajectories and Spontaneous Preterm Birth

| Social mobility measure                | B      | SE    | <i>p</i> -value | RR    | 95% CI         |
|----------------------------------------|--------|-------|-----------------|-------|----------------|
| <b>Educational mobility trajectory</b> |        |       |                 |       |                |
| Mother to daughter                     |        |       |                 |       |                |
| Model 2                                | 0.019  | 0.109 | 0.862           | 1.019 | (0.823, 1.261) |
| Model 3                                | 0.049  | 0.109 | 0.651           | 1.051 | (0.848, 1.302) |
| <b>Financial mobility trajectory</b>   |        |       |                 |       |                |
| Early childhood to current             |        |       |                 |       |                |
| Model 2                                | -0.153 | 0.114 | 0.180           | 0.858 | (0.687, 1.073) |
| Model 3                                | -0.170 | 0.117 | 0.145           | 0.844 | (0.672, 1.060) |
| Middle childhood to current            |        |       |                 |       |                |
| Model 2                                | -0.176 | 0.102 | 0.086           | 0.839 | (0.687, 1.025) |
| Model 3                                | -0.186 | 0.104 | 0.073           | 0.830 | (0.678, 1.017) |

*Notes:* Model 2: adjusted for age, childhood SEP, and parity. Model 3: adjusted for age, childhood SEP, parity, and for the other form of social mobility (e.g., models for educational mobility controlled for financial mobility from early childhood; models for financial mobility controlled for educational mobility). Relative risks calculated from Poisson regression models; reference=full term births. Indicated preterm births excluded (N=88). All social mobility measures are scaled so that a one-unit change corresponds with a 1-SD change. Missing data were imputed using multiple imputation by chained equations. N=1,320 (N=143 spontaneous preterm, N=1,177 full term).

B, Beta; RR, risk ratio; SEP, socioeconomic position



**Appendix**  
**Life Course Social Mobility and Reduced Risk of Adverse Birth Outcomes**  
**Osypuk et al.**

**Appendix Table 9.** Associations of Improved Social Mobility Trajectories and Low Birth Weight

| Social mobility measure                |         | B      | SE    | <i>p</i> -value | RR    | 95% CI         |
|----------------------------------------|---------|--------|-------|-----------------|-------|----------------|
| <b>Educational mobility trajectory</b> |         |        |       |                 |       |                |
| Mother to daughter                     |         |        |       |                 |       |                |
|                                        | Model 1 | 0.042  | 0.069 | 0.535           | 1.043 | (0.912, 1.193) |
|                                        | Model 2 | -0.041 | 0.095 | 0.667           | 0.960 | (0.797, 1.156) |
|                                        | Model 3 | -0.019 | 0.097 | 0.846           | 0.981 | (0.811, 1.187) |
| <b>Financial mobility trajectory</b>   |         |        |       |                 |       |                |
| Early childhood to current             |         |        |       |                 |       |                |
|                                        | Model 1 | -0.071 | 0.069 | 0.306           | 0.931 | (0.813, 1.067) |
|                                        | Model 2 | -0.129 | 0.095 | 0.175           | 0.879 | (0.730, 1.059) |
|                                        | Model 3 | -0.118 | 0.097 | 0.223           | 0.888 | (0.734, 1.075) |
| Middle childhood to current            |         |        |       |                 |       |                |
|                                        | Model 1 | -0.016 | 0.071 | 0.817           | 0.984 | (0.856, 1.130) |
|                                        | Model 2 | -0.099 | 0.089 | 0.265           | 0.906 | (0.761, 1.078) |
|                                        | Model 3 | -0.093 | 0.090 | 0.305           | 0.911 | (0.764, 1.088) |

*Notes:* Model 1: bivariate. Model 2: adjusted for age, childhood SEP, and parity. Model 3: adjusted for age, childhood SEP, parity, and for the other form of social mobility (e.g. models for educational mobility controlled for financial mobility from early childhood; models for financial mobility controlled for educational mobility). Relative risks calculated from Poisson regression models. All social mobility measures are scaled so that a one-unit change corresponds with a 1-SD change. Missing data were imputed using multiple imputation by chained equations. N=1408.

B, Beta; RR, risk ratio; SEP, socioeconomic position

**Appendix**  
**Life Course Social Mobility and Reduced Risk of Adverse Birth Outcomes**  
**Osypuk et al.**

**Appendix Table 10.** Associations of Improved Social Mobility Trajectories and Primary Birth Outcomes, Restricted by Age

| Social mobility measure                | Small for gestational age |       |         |       |                | Preterm birth |       |         |       |                |
|----------------------------------------|---------------------------|-------|---------|-------|----------------|---------------|-------|---------|-------|----------------|
|                                        | B                         | SE    | p-value | RR    | 95% CI         | B             | SE    | p-value | RR    | 95% CI         |
| <b>Educational mobility trajectory</b> |                           |       |         |       |                |               |       |         |       |                |
| Mother to daughter                     |                           |       |         |       |                |               |       |         |       |                |
| Entire LIFE sample (N=1,408)           | -0.272                    | 0.091 | 0.003   | 0.762 | (0.638, 0.910) | -0.079        | 0.084 | 0.347   | 0.924 | (0.783, 1.090) |
| Restricted to 20+ years (N=1,289)      | -0.333                    | 0.094 | <0.001  | 0.717 | (0.596, 0.862) | -0.087        | 0.087 | 0.319   | 0.917 | (0.773, 1.088) |
| Restricted to 25+ years (N=856)        | -0.327                    | 0.117 | 0.005   | 0.721 | (0.573, 0.907) | -0.138        | 0.106 | 0.192   | 0.871 | (0.708, 1.072) |
| <b>Financial mobility trajectory</b>   |                           |       |         |       |                |               |       |         |       |                |
| Early childhood to current             |                           |       |         |       |                |               |       |         |       |                |
| Entire LIFE sample (N=1,408)           | -0.158                    | 0.089 | 0.077   | 0.854 | (0.717, 1.017) | -0.083        | 0.087 | 0.339   | 0.920 | (0.776, 1.092) |
| Restricted to 20+ years (N=1,289)      | -0.156                    | 0.094 | 0.095   | 0.855 | (0.712, 1.028) | -0.103        | 0.090 | 0.251   | 0.902 | (0.756, 1.076) |
| Restricted to 25+ years (N=856)        | -0.198                    | 0.112 | 0.077   | 0.820 | (0.659, 1.022) | -0.071        | 0.113 | 0.528   | 0.931 | (0.747, 1.161) |
| Middle childhood to current            |                           |       |         |       |                |               |       |         |       |                |
| Entire LIFE sample (N=1,408)           | -0.141                    | 0.082 | 0.084   | 0.868 | (0.740, 1.019) | -0.103        | 0.079 | 0.190   | 0.902 | (0.773, 1.053) |
| Restricted to 20+ years (N=1289)       | -0.140                    | 0.085 | 0.099   | 0.869 | (0.736, 1.027) | -0.127        | 0.080 | 0.113   | 0.881 | (0.752, 1.031) |
| Restricted to 25+ years (N=856)        | -0.187                    | 0.101 | 0.063   | 0.830 | (0.681, 1.011) | -0.093        | 0.100 | 0.351   | 0.911 | (0.750, 1.108) |

*Notes:* Model 2, which adjusted for age, childhood SEP, and parity. Relative risks calculated from Poisson regression models. All social mobility measures are scaled so that a one-unit change corresponds with a one-SD change. Missing data were imputed using multiple imputation by chained equations. N=1,408.

LIFE, Life-course Influences of Fetal Environments Study; B, Beta; RR, risk ratio; SEP, socioeconomic position

Appendix  
Life Course Social Mobility and Reduced Risk of Adverse Birth Outcomes  
Osypuk et al.

Appendix Figure 1. Conceptual operationalization of social mobility measures.

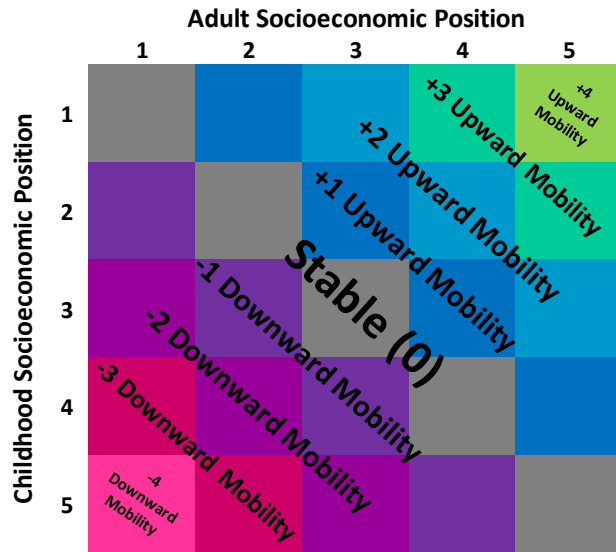

Notes: The financial mobility scale ranges from -4 to +4, as shown here; however the educational mobility scale ranges from -3 to +3.

**Appendix**  
**Life Course Social Mobility and Reduced Risk of Adverse Birth Outcomes**  
**Osypuk et al.**

**Appendix Figure 2.** Distribution of social mobility measures (N=1,408).

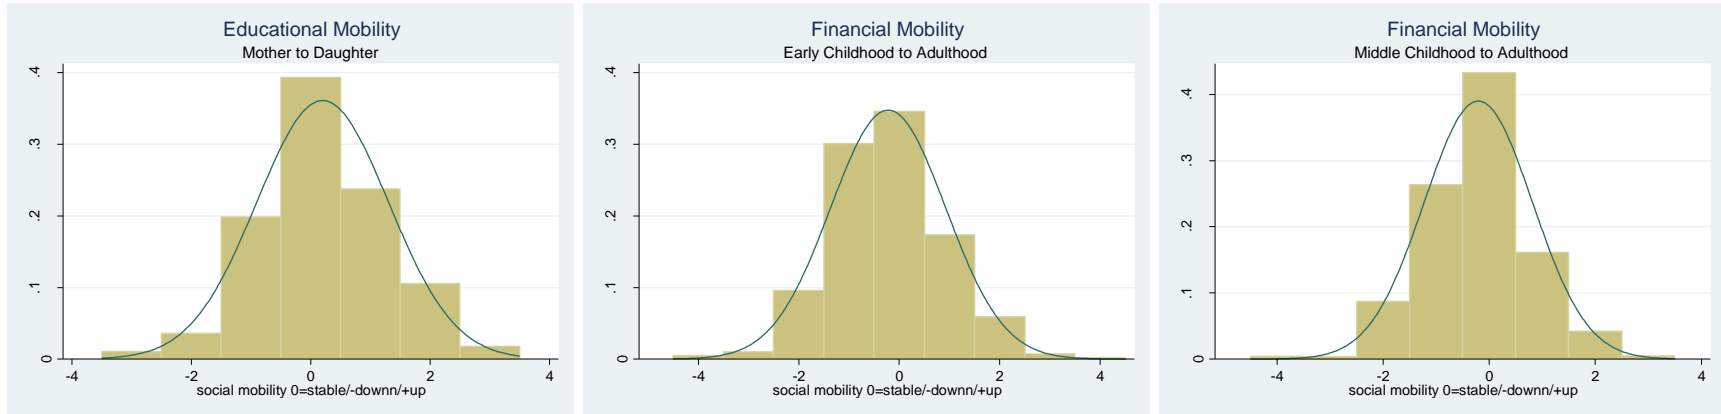

*Notes:* Missing values excluded from histograms (educational mobility=5.7%, financial mobility early childhood=0.02%, financial mobility middle childhood=0.01%).
